# Supplementary material
Source: PubMed Central journal article supplement (PMC4546562)

Morgan, R.K. and Cohen, M.S.

Supporting information for:

**A clickable aminoxy probe for monitoring cellular ADP-ribosylation**

Rory K. Morgan and Michael S. Cohen

Program in Chemical Biology and Department of Physiology and Pharmacology, Oregon Health & Science University, Portland, Oregon 97210, United States

Morgan, R.K. and Cohen, M.S.

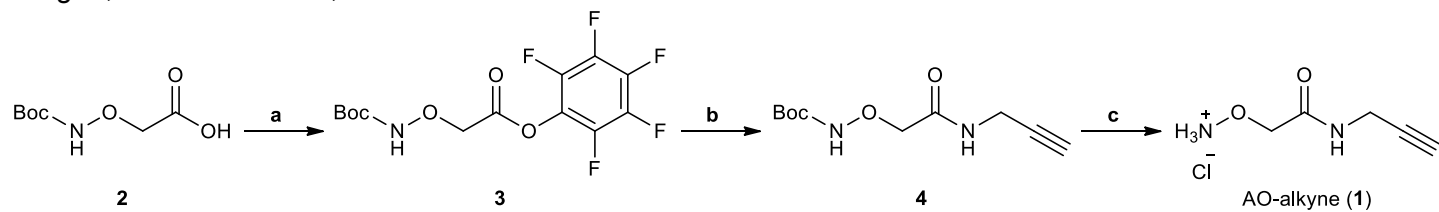

**Supporting Scheme 1.** Synthesis of AO-alkyne (1). *Reagents and conditions:* (a) TFA-OPfp, pyr, DCM, rt, 71%; (b) propargylamine, DIPEA, DCM, rt, 96%; (c) 4N HCl, dioxane, rt, 63%.

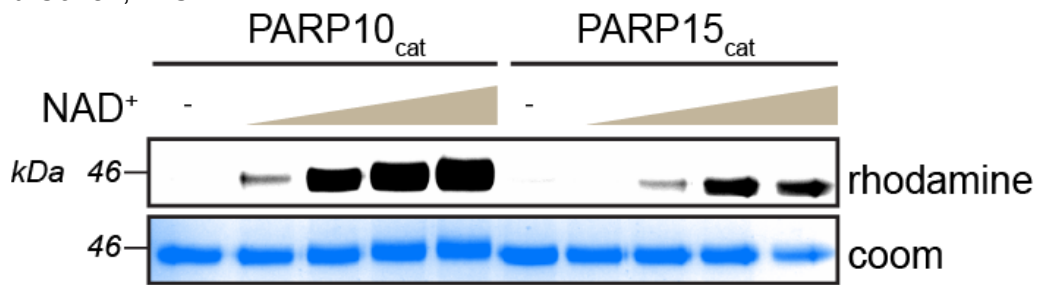

**Supporting Figure 1.** PARP10<sub>cat</sub> and PARP15<sub>cat</sub>-mediated ADP-ribosylation of SRPK2 *in vitro* is detected by **1** following click conjugation with rhodamine-azide. SRPK2 was ADP-ribosylated by PARP10<sub>cat</sub> or PARP15<sub>cat</sub> in the presence of NAD<sup>+</sup> (0, 1, 10, 50, or 100 μM) at 30 °C for 1h, followed by labeling with **1** (100 μM) at pH 5 with PDA (10 mM) and subsequent click conjugation with rhodamine-azide (100 μM).

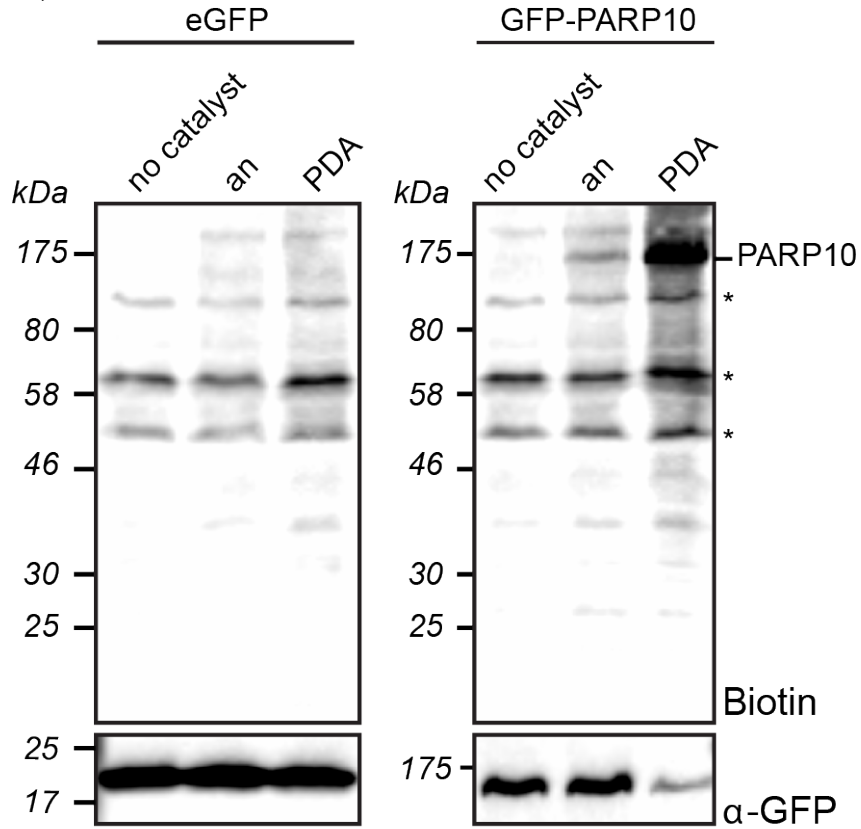

**Supporting Figure 2.** Labeling of ADP-ribosylated GFP-PARP10 by **1** is most efficient with PDA catalysis. HEK 293T cells overexpressing either GFP-PARP10 WT and eGFP (negative control) were treated with **1** (100  $\mu$ M) and PDA (10 mM) for 1 h at 37  $^{\circ}$ C. Lysates were subjected to click conjugation with biotin- $N_3$  (100  $\mu$ M) and analyzed via immunoblot. Detection with an  $\alpha$ -GFP antibody serves as a loading control. Bands marked with an asterisk represent endogenous biotinylated proteins. PDA = *p*-phenylenediamine, an = aniline.

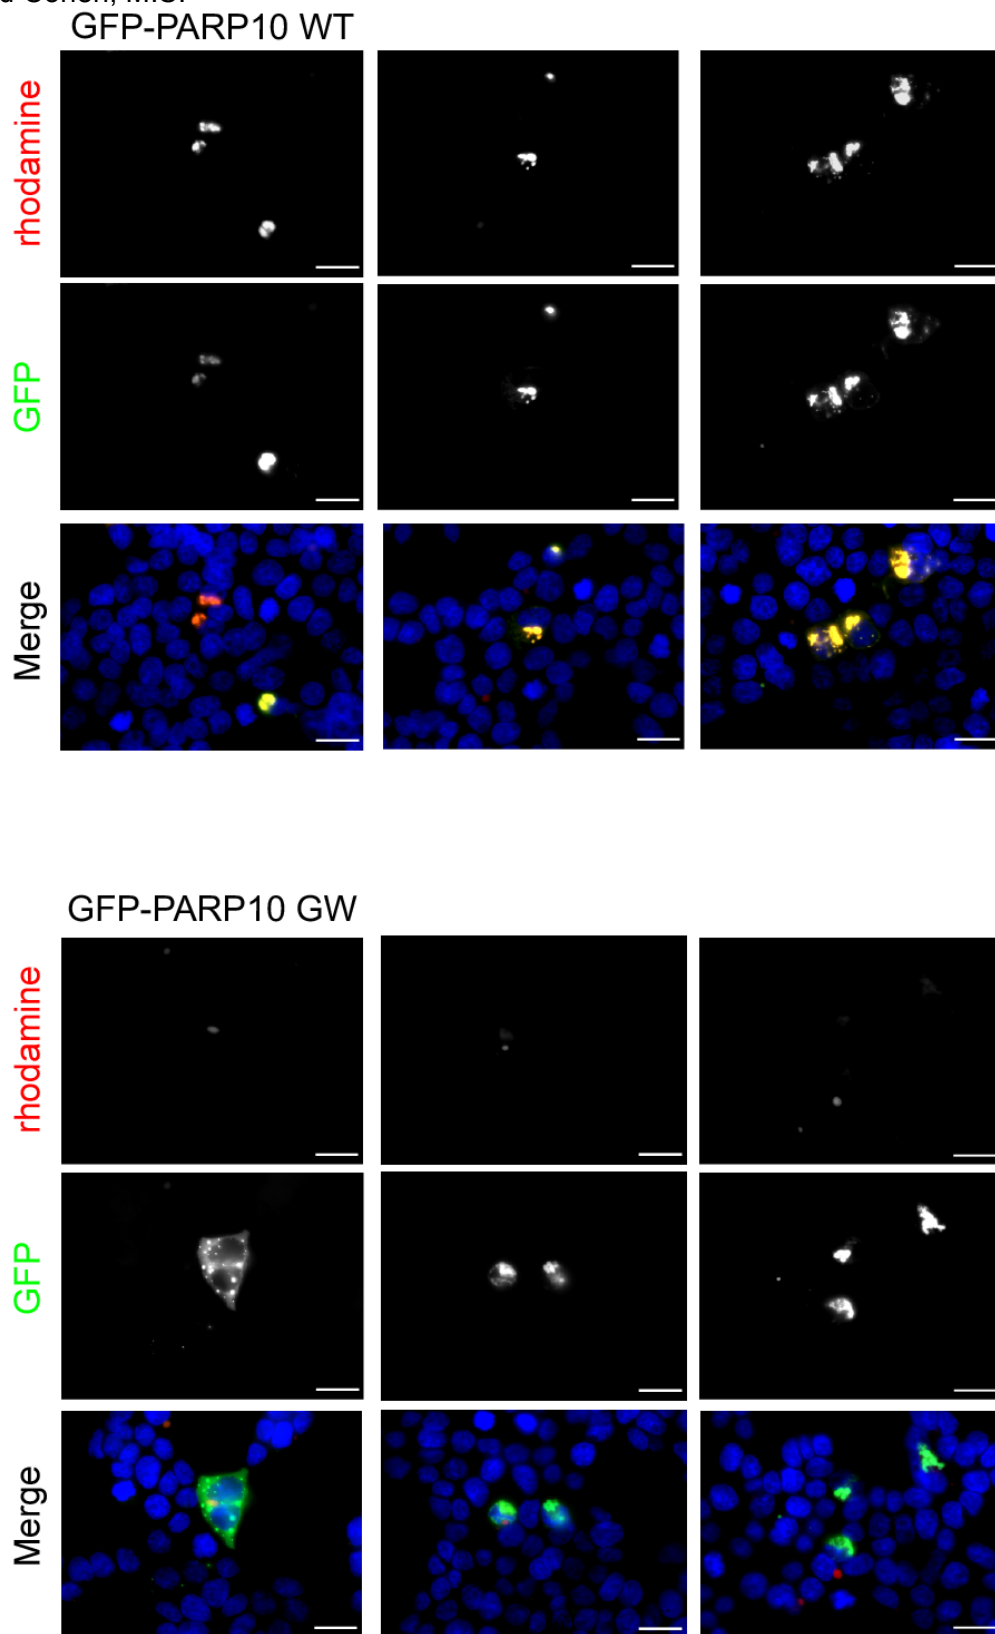

**Supporting Figure 3.** Additional representative images for detection of PARP10 activity in cells with **1**. HEK 293T cells expressing either GFP-PARP10 WT or GFP-PARP10 GW (catalytically dead) were treated with **1** (100  $\mu$ M) and PDA (10 mM) for 1 h at 37  $^{\circ}$ C. After fixation, permeabilization, and blocking, the cells were subjected to click conjugation with rhodamine-azide (1  $\mu$ M) for 30 min. Scale bar corresponds to 20  $\mu$ m.

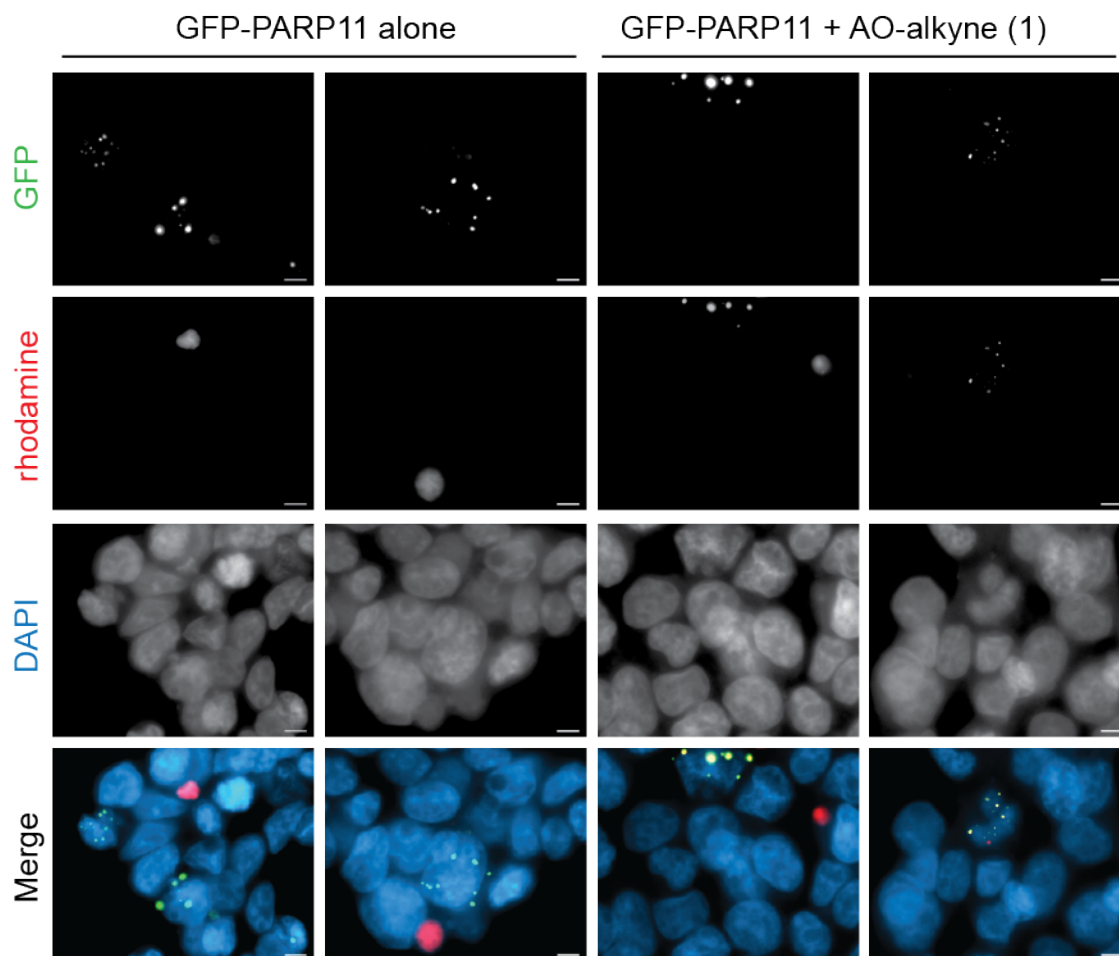

**Supporting Figure 4.** Detection of PARP11 activity in cells with **1**. HEK 293T cells expressing GFP-PARP11 WT were treated with or without **1** (100  $\mu$ M) and PDA (10 mM) for 1 h at 37  $^{\circ}$ C. After fixation, permeabilization, and blocking, the cells were subjected to click conjugation with rhodamine-azide (1  $\mu$ M) for 30 min. Scale bar corresponds to 5  $\mu$ m.

## Supporting Compound Characterization:

Compound 3:

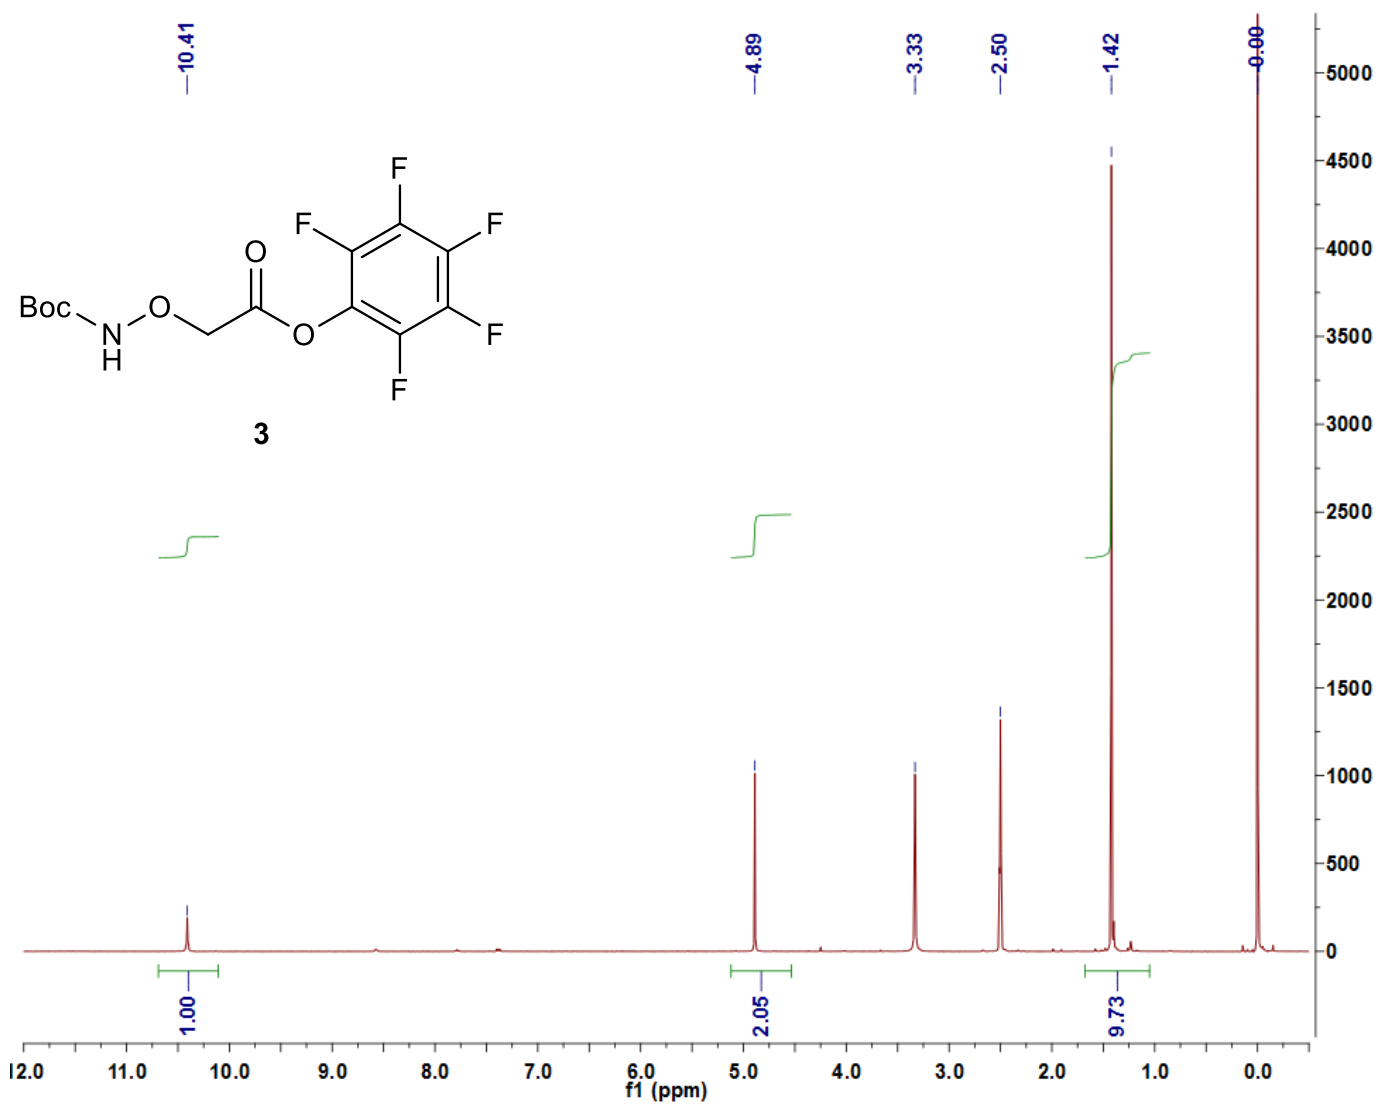

Compound 4:

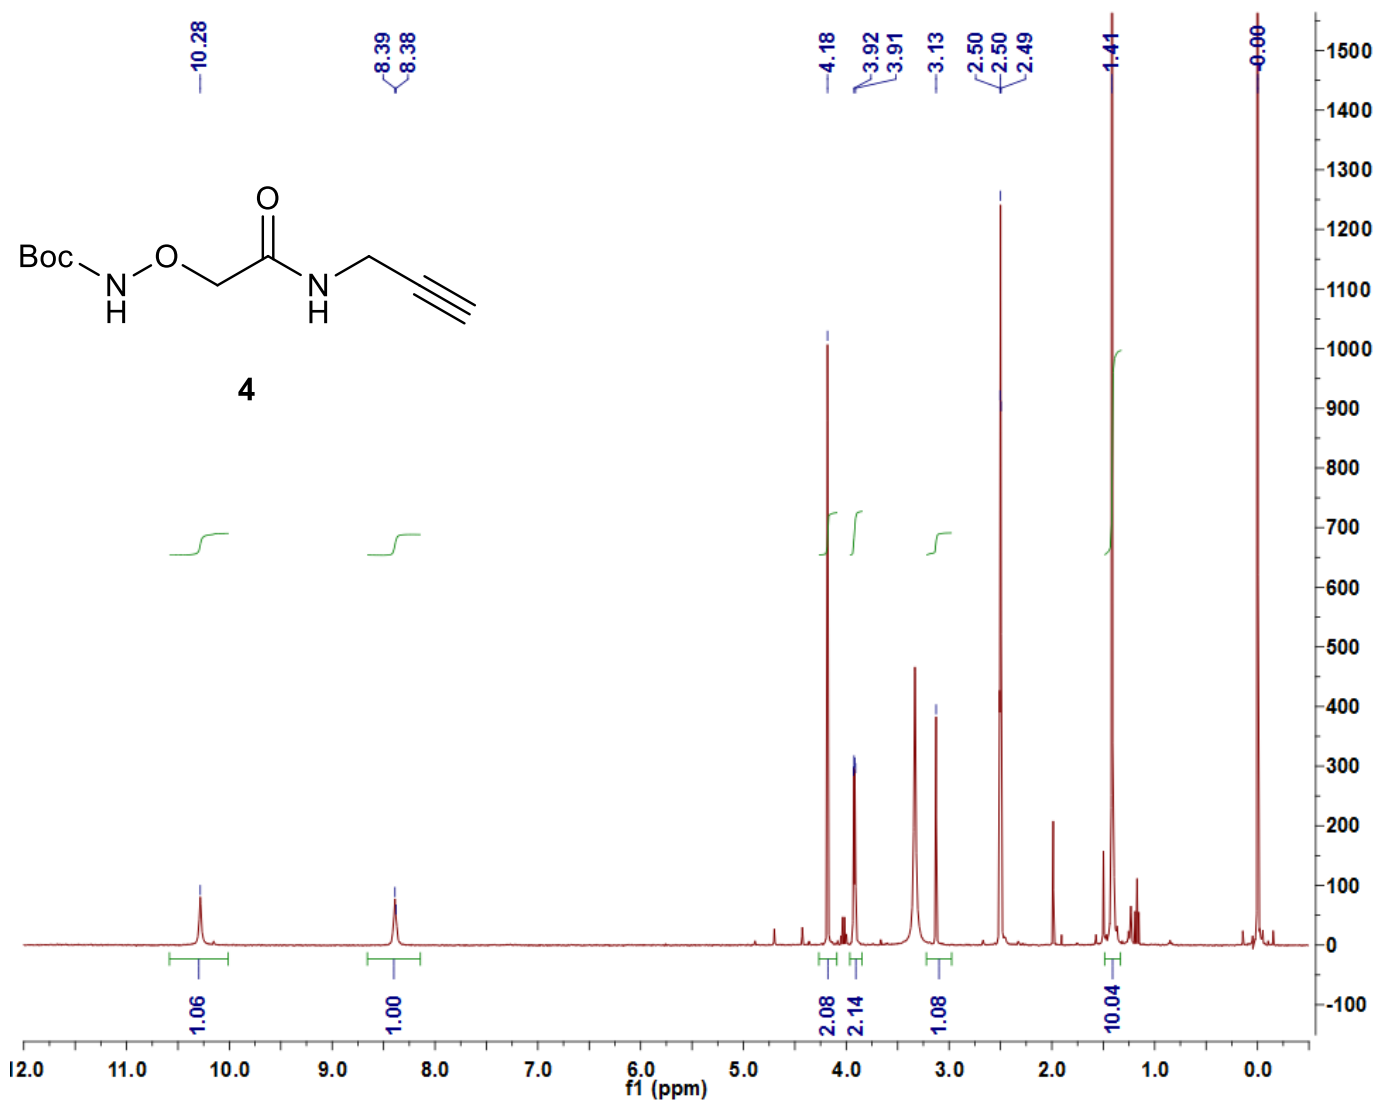



AO-alkyne (1):

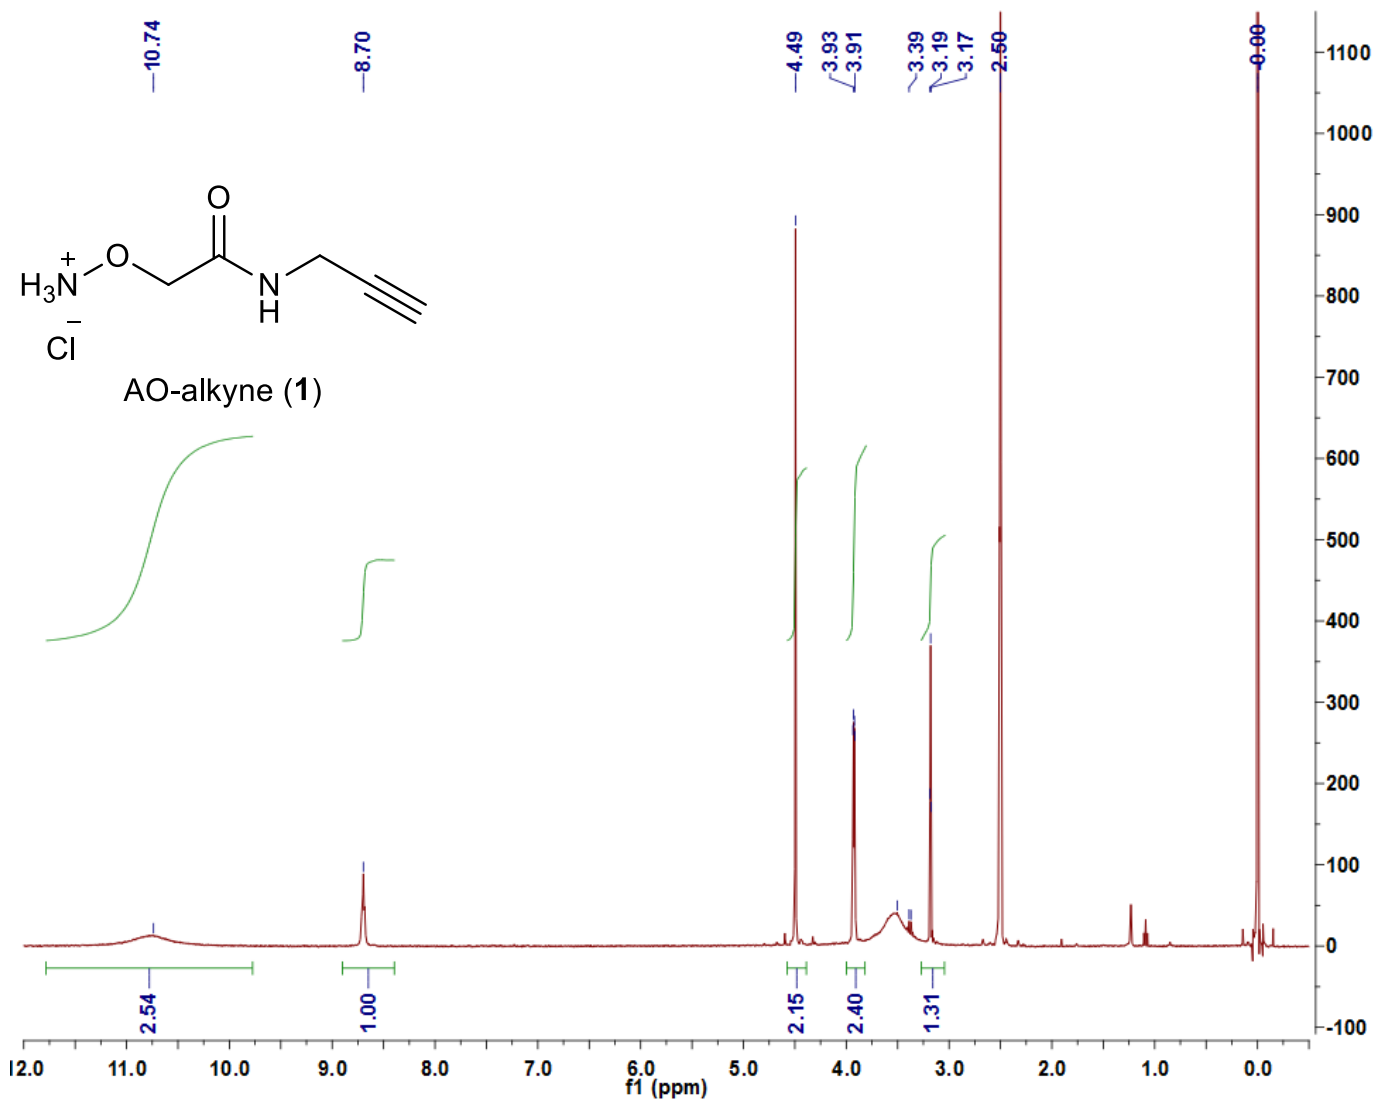

Supplement: NIHMS697955-supplement-Supplemental.pdf [file NIHMS697955-supplement-Supplemental.pdf]
